# Supplementary material for: Extensive translation of small Open Reading Frames revealed by Poly-Ribo-Seq
Source: eLife journal article supplement (doi:10.7554/elife.03528), 2014-08-21
Supplement: supp [file elife-03528-supp-v1.zip]

Archive with 9 entries (9 files):
- elife_poa_e03528_Figure_4_figure_supplement_1.pdf
- elife_poa_e03528_Supplementary_File_2.docx
- elife_poa_e03528_Supplementary_File_3.zip
- elife_poa_e03528_Figure_3_figure_supplement_2.pdf
- elife_poa_e03528_Figure_2_figure_supplement_1.pdf
- elife_poa_e03528_Figure_3_figure_supplement_1.pdf
- elife_poa_e03528_Supplementary_File_1.docx
- elife_poa_e03528_Figure_1_figure_supplement1.pdf
- elife_poa_e03528_Figure_1_figure_supplement_2.pdf
