# Supplementary material for: Extensive translation of small Open Reading Frames revealed by Poly-Ribo-Seq
Source: eLife journal article supplement (doi:10.7554/elife.03528), 2014-08-21
Supplement: supp [file elife-03528-supp-v1.zip › elife_poa_e03528_Figure_1_figure_supplement_2.pdf]

| Ribosome-mRNA complex                                                                        | Polysomes                                                                                                              | Translational Metrics                                                       | Interpretation                                                                                     |
|----------------------------------------------------------------------------------------------|------------------------------------------------------------------------------------------------------------------------|-----------------------------------------------------------------------------|----------------------------------------------------------------------------------------------------|
| <p>A</p> 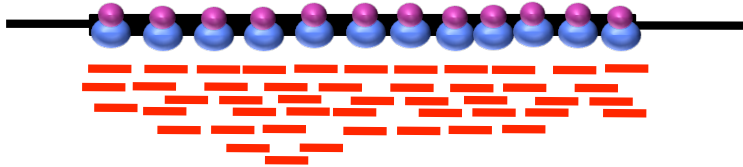   | 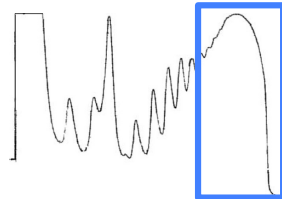 <p>Large polysomes<br/>(7+)</p>    | <p>High RPKM<br/>(median 40.2)</p> <p>High Coverage<br/>(median 0.67)</p>   | <p>-Canonical ORFs covered by many ribosomes</p> <p>-highly translated</p>                         |
| <p>B</p> 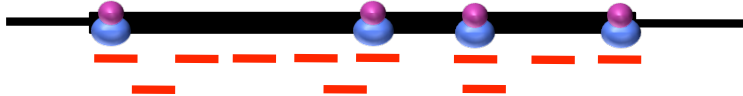   | 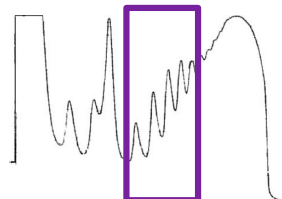 <p>Small polysomes<br/>(2-6)</p>   | <p>Medium RPKM<br/>(median 27.2)</p> <p>High Coverage<br/>(median 0.75)</p> | <p>-Canonical ORF bound by a few ribosomes but distributed across ORF</p> <p>-lowly translated</p> |
| <p>C</p> 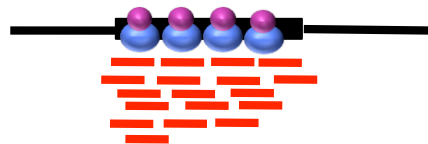  | 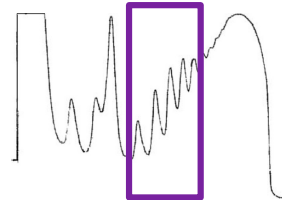 <p>Small polysomes<br/>(2-6)</p>  | <p>High RPKM<br/>(median 82.7)</p> <p>High Coverage<br/>(median 0.96)</p>   | <p>-Small ORF in own mRNA</p> <p>-highly translated</p>                                            |
| <p>D</p> 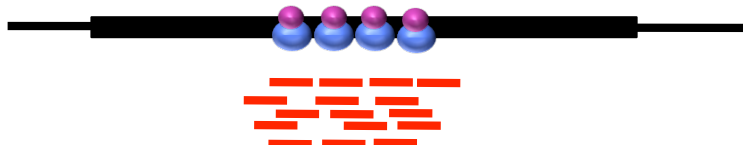 | 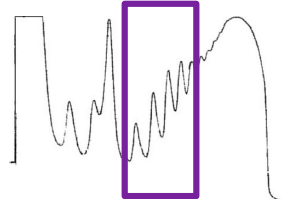 <p>Small polysomes<br/>(2-6)</p> | <p>Medium RPKM</p> <p>Low Coverage<br/>(<math>&lt;0.40</math>)</p>          | <p>-Canonical ORF containing theoretical small ORF</p>                                             |

Figure 1-Figure Supplement 2
