# Supplementary figures and images for: Extensive translation of small Open Reading Frames revealed by Poly-Ribo-Seq
Source: eLife journal article supplement (doi:10.7554/elife.03528), 2014-08-21

A

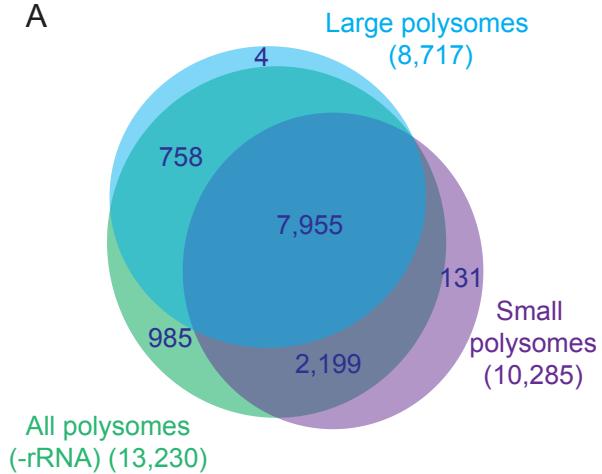

B

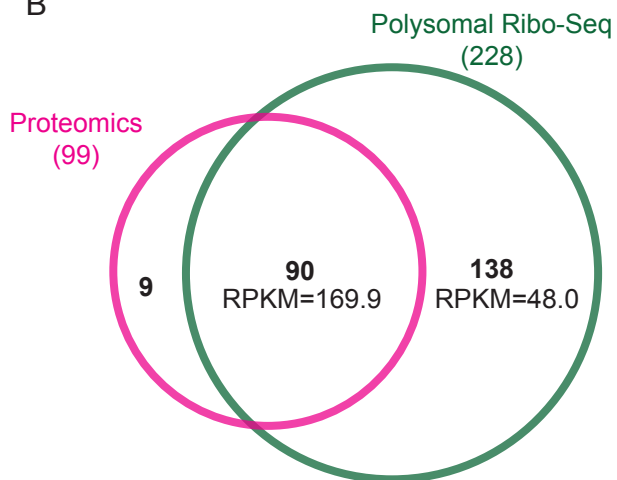

Figure 2-Figure Supplement 1

Supplement: supp [file elife-03528-supp-v1.zip]

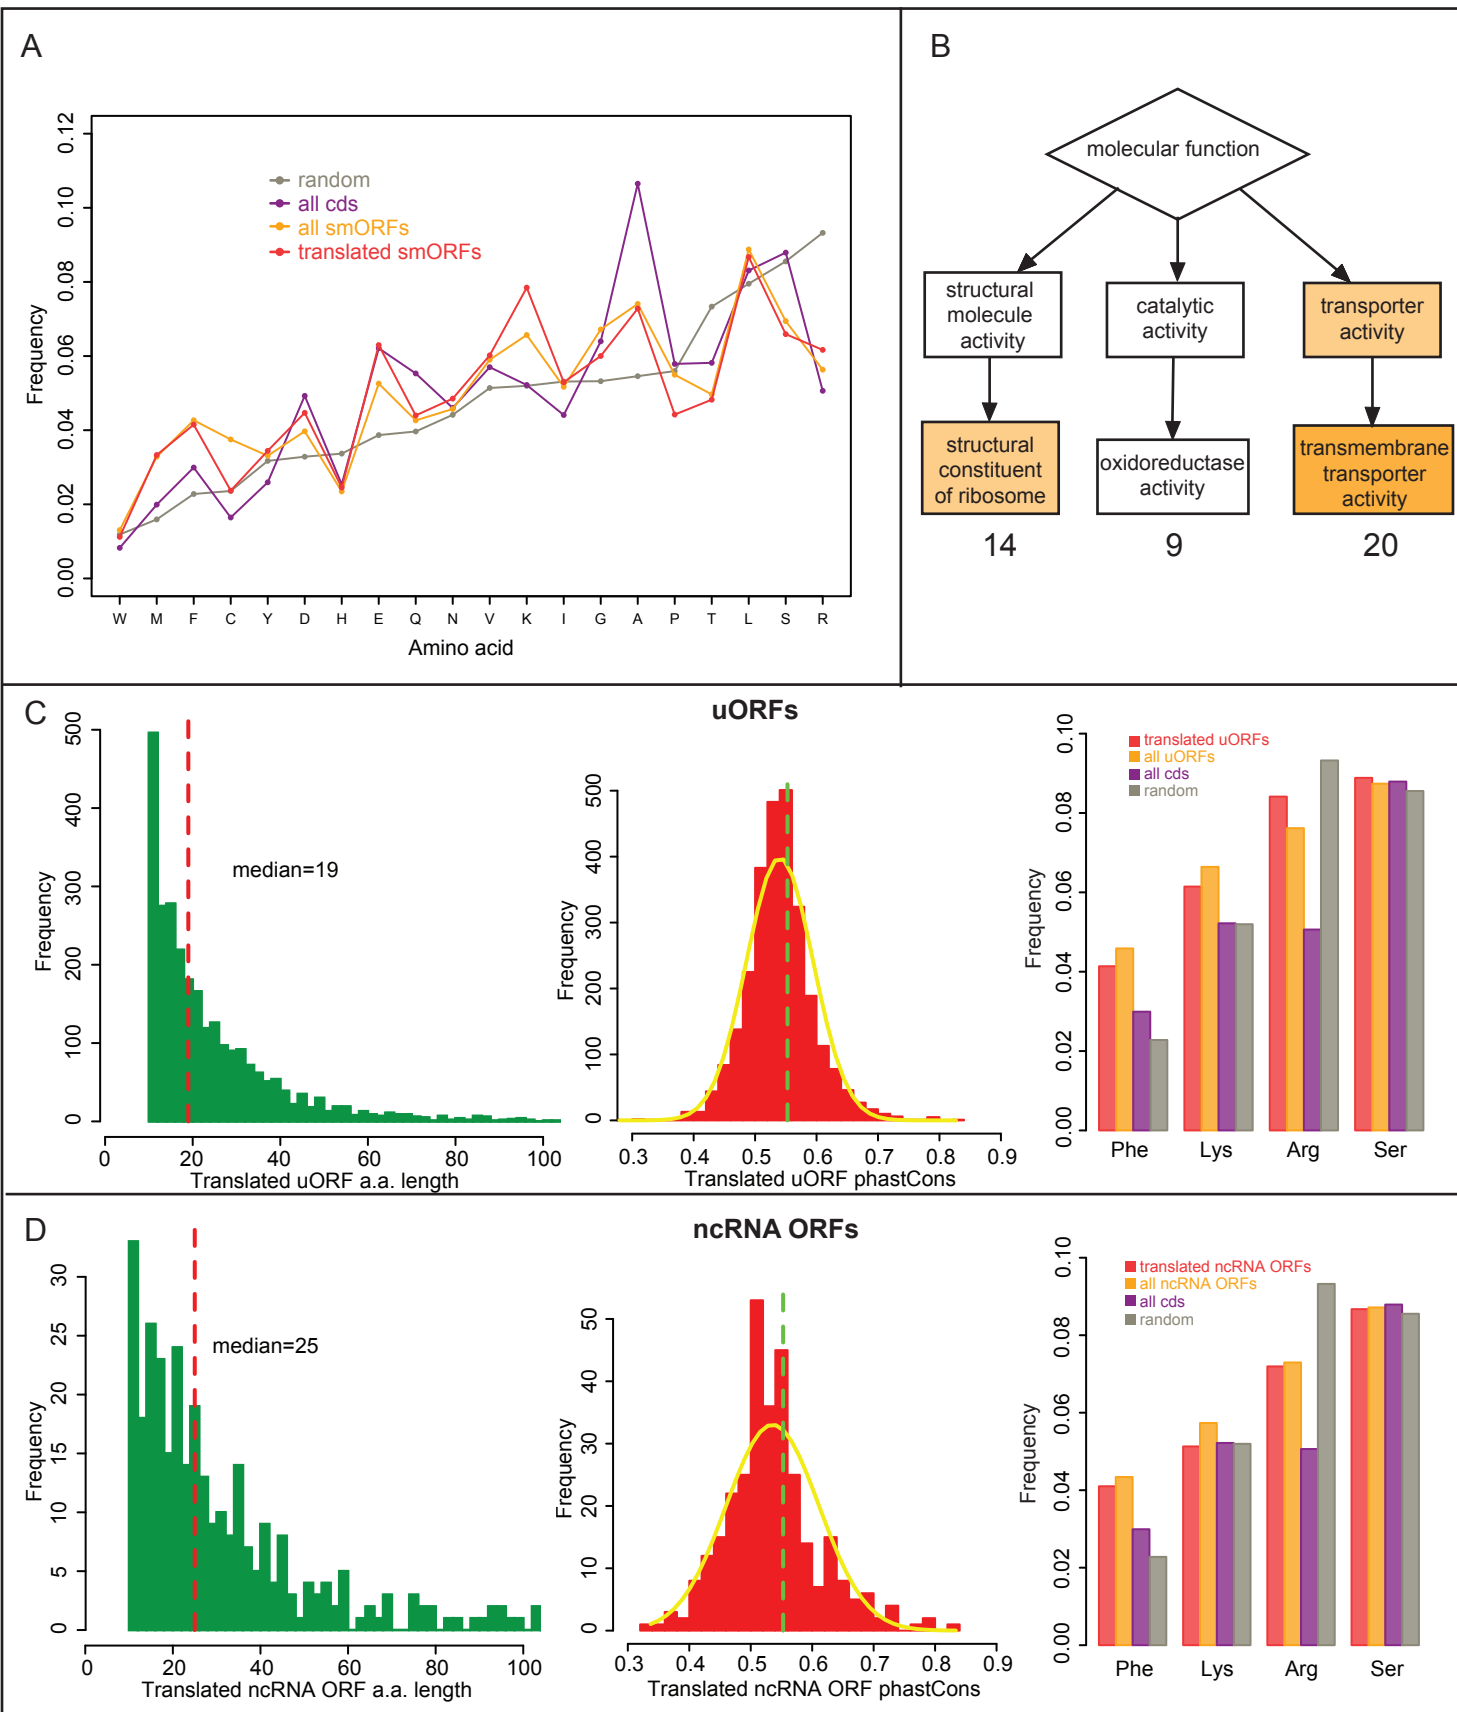

Figure 4-Figure Supplement 1

Supplement: supp [file elife-03528-supp-v1.zip]

A

tagged ncRNA ORFs

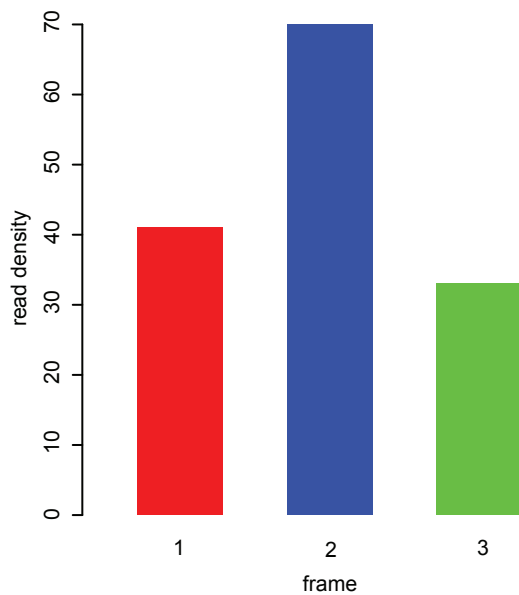

B

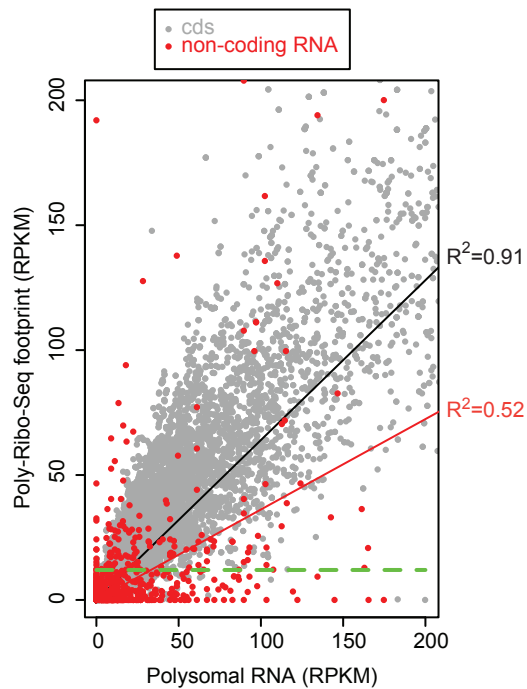

Figure 3-Figure Supplement 2

Supplement: supp [file elife-03528-supp-v1.zip › elife_poa_e03528_Figure_3_figure_supplement_2.pdf]

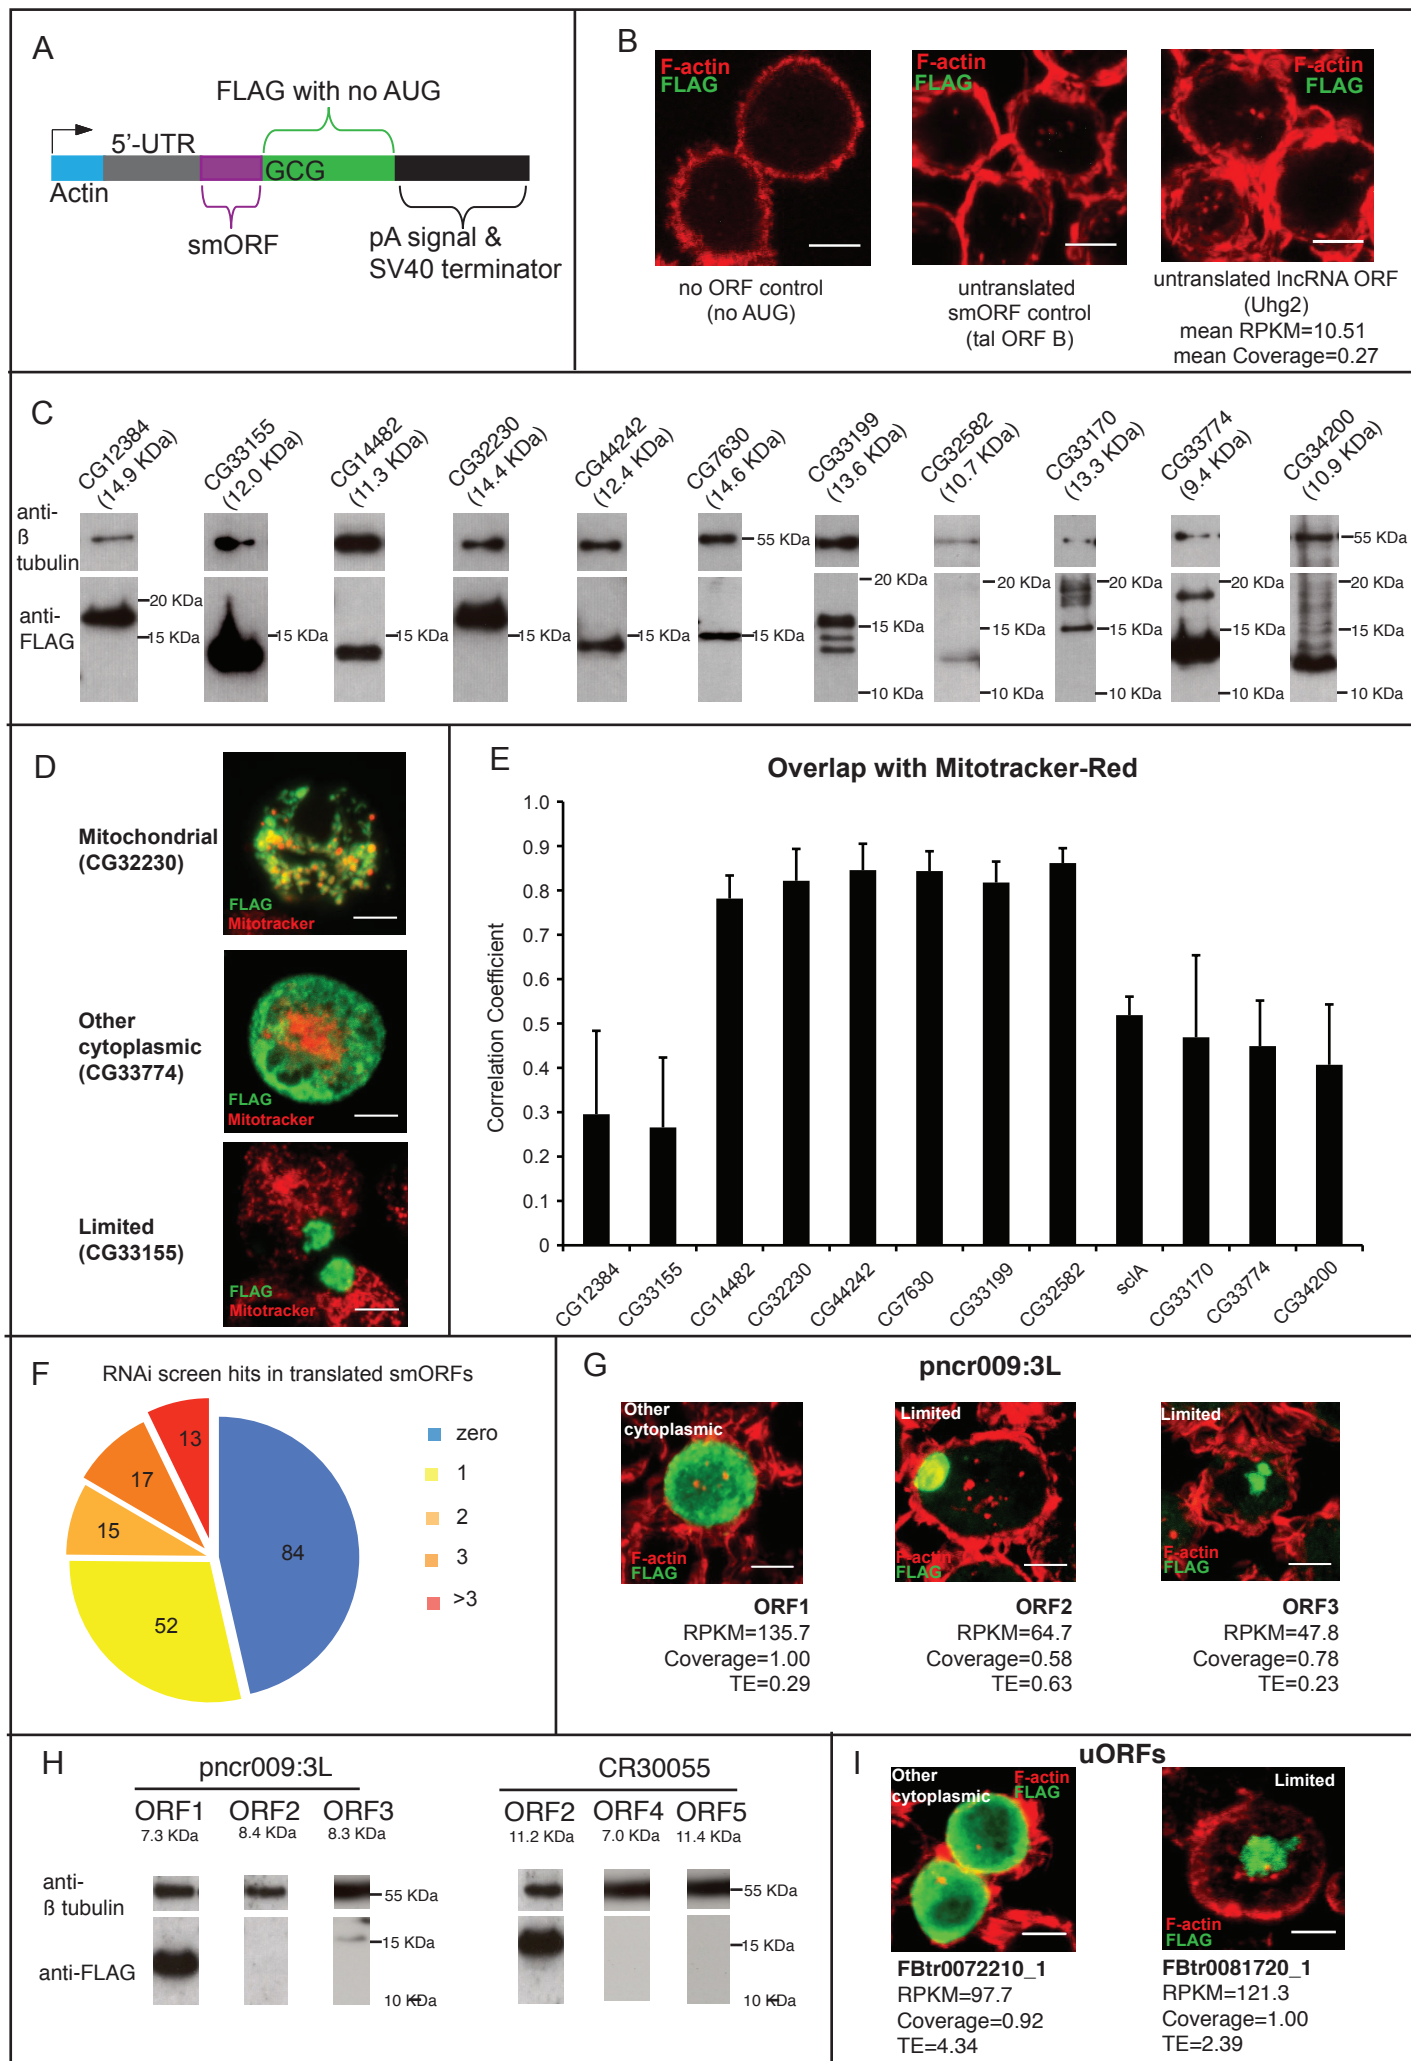

Figure 3-Figure Supplement 1

Supplement: supp [file elife-03528-supp-v1.zip › elife_poa_e03528_Figure_3_figure_supplement_1.pdf]

A

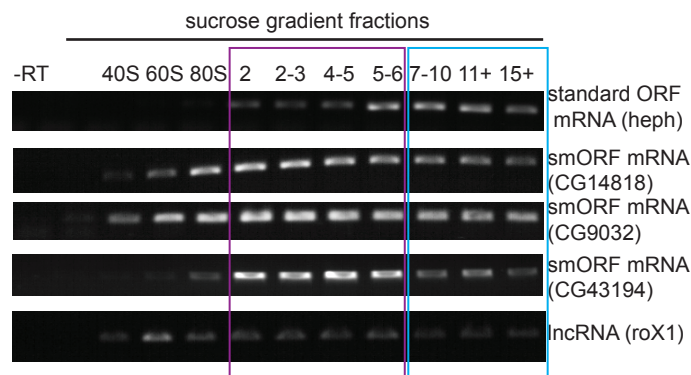

B

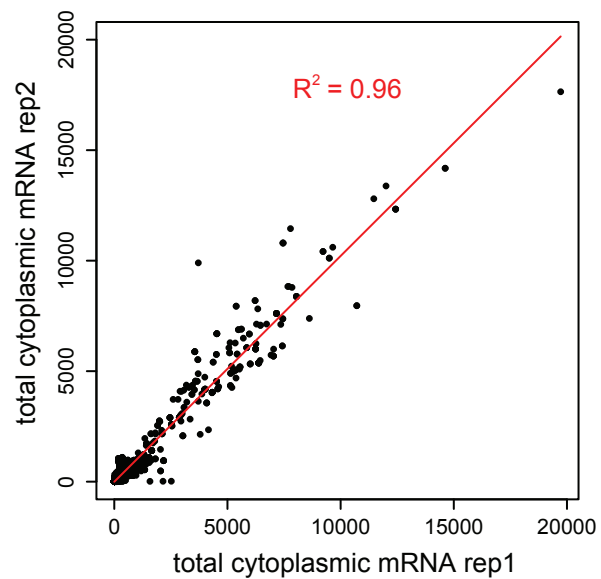

C

small polysomes CDS

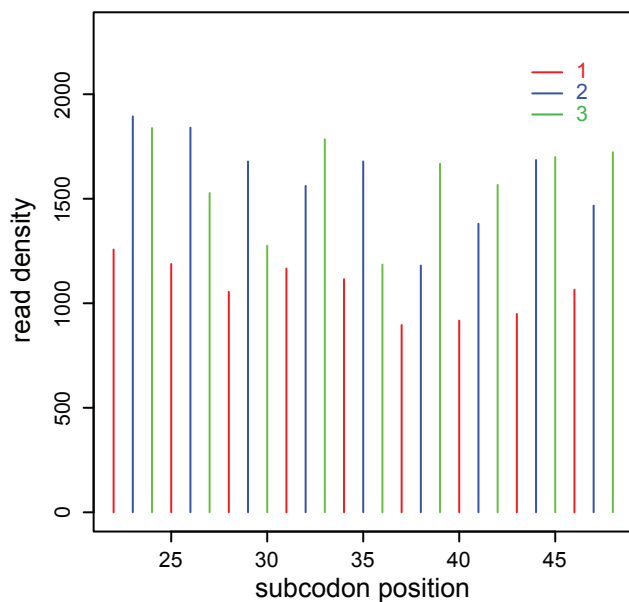

D

small polysomes 3'-UTR

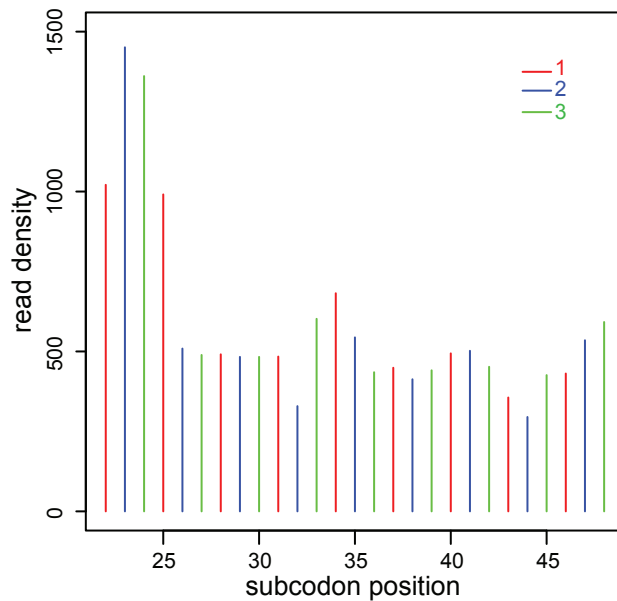

Figure 1- figure supplement 1

Supplement: supp [file elife-03528-supp-v1.zip › elife_poa_e03528_Figure_1_figure_supplement1.pdf]
